# Supplementary material
Source: publisher site journal article supplement (https://www.dovepress.com/article/340053)
Supplement: Supplementary file 1 [file get_supplementary_file.php]

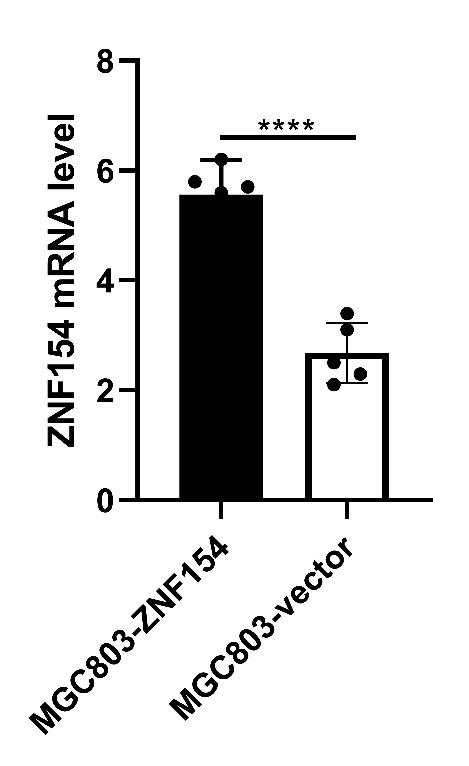


**Supplementary Figure 1:**ZNF154 mRNA levels of MGC803-ZNF154 and MGC803-vector cells. Data are presented as mean ± SD of triplicate experiments， ****p<0.0001.
